# Supplementary material for: Targeting TBC1D15 Reverses TMZ-resistance in Glioblastoma by Modulating Lysosomal Ca²⁺/TFEB/Cx43 Axis via Mitochondria-Lysosome Contact
Source: Research Square preprint supplement (doi:10.21203/rs.3.rs-7218795/v1), 2025-09-03
Supplement: Supplementary file 1 [file 8762e47cfce909c2cdf936c9.docx]

Full and uncropped western blot for Figure 1

U251R

Fig 1 D

Fig 1 D

Fig 1 D


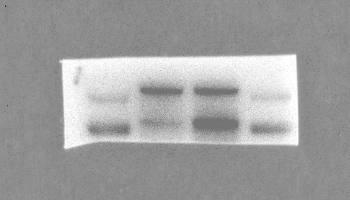

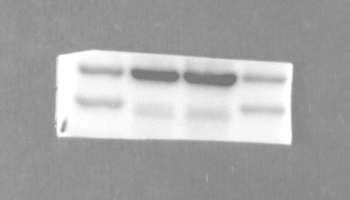

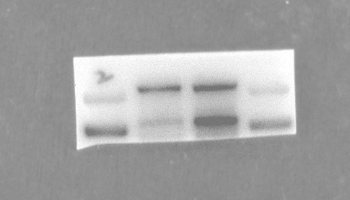

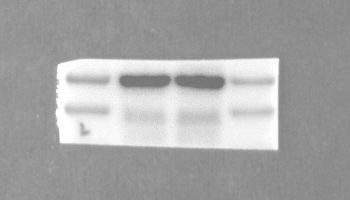

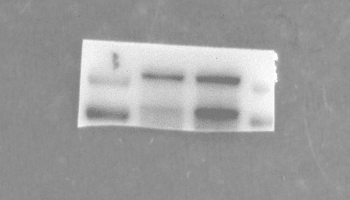

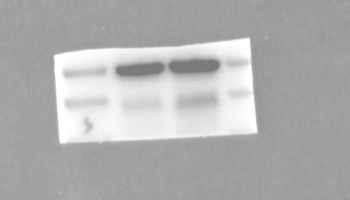


TBC1D15

*β*-Tubulin

LN229R

Fig 1 D

Fig 1 D

Fig 1 D


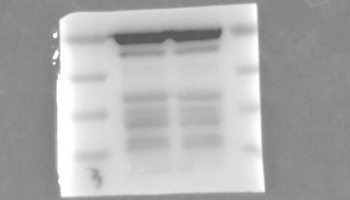

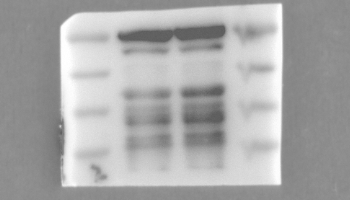

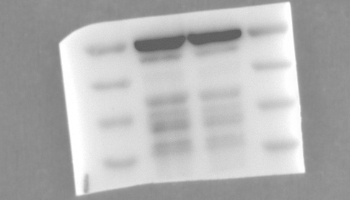

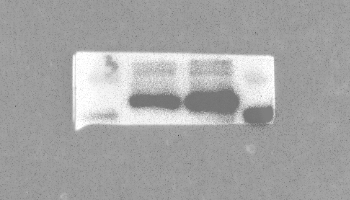

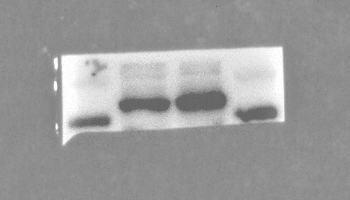

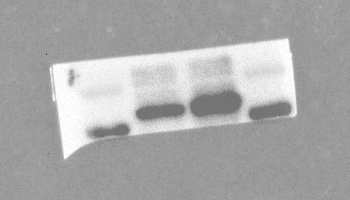


*β*-Tubulin

TBC1D15


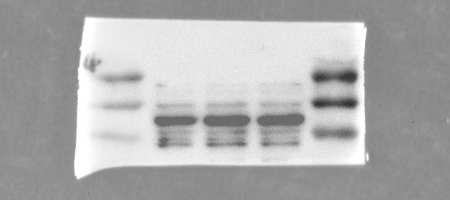

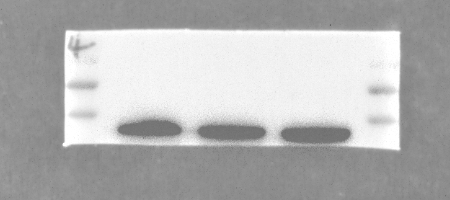

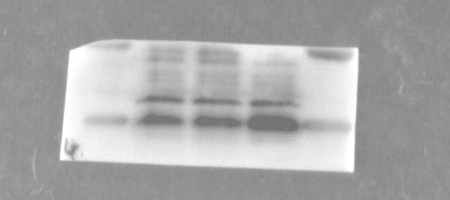

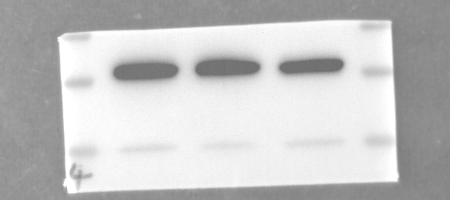

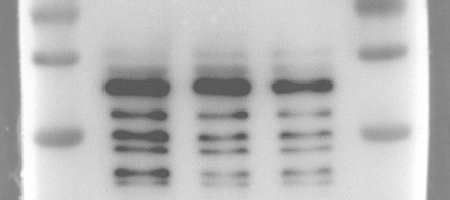

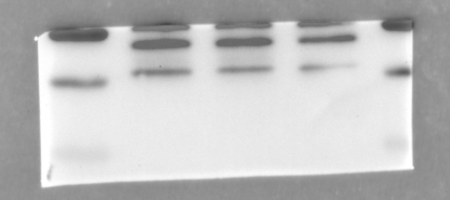

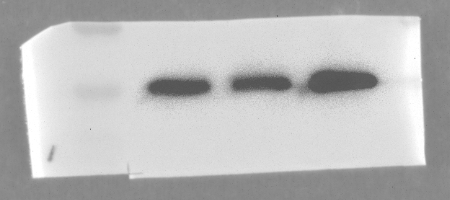

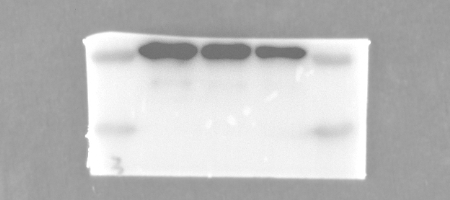

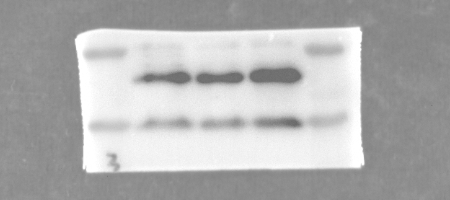

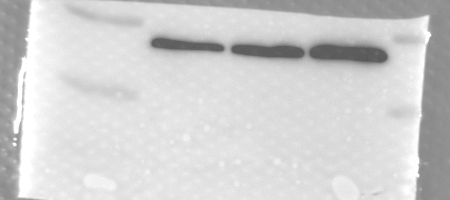

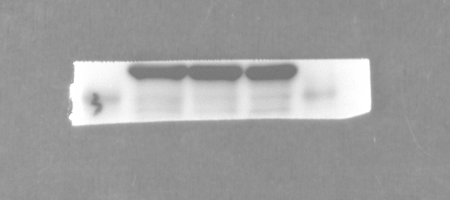

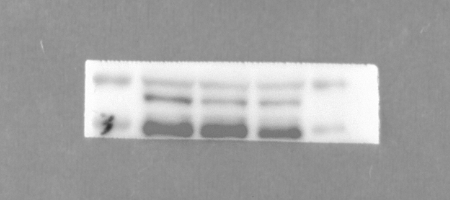

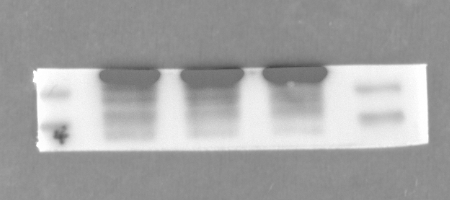

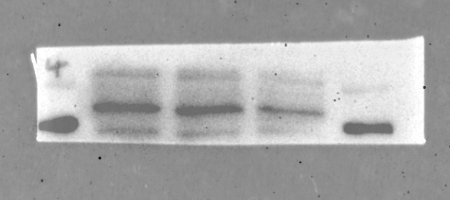
Full and uncropped western blot for Figure 2

Cleaved Caspase-3

GAPDH

Caspase-3

Bcl-2

Bax

Fig 2F

Fig 2F

GAPDH

TBC1D15

GAPDH

TBC1D15

Fig 2A

Full and uncropped western blot for Figure 3

Fig 3G

Fig 3G

Fig 3B


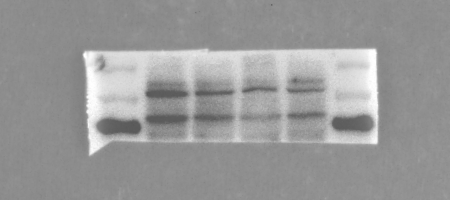

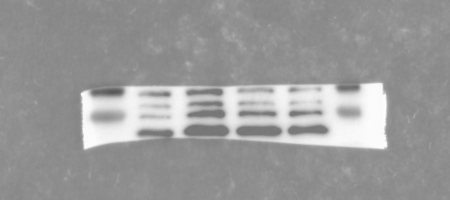

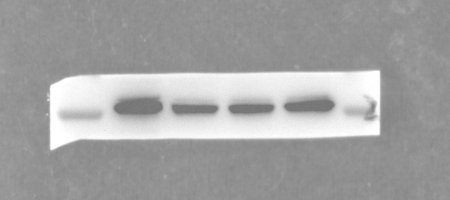

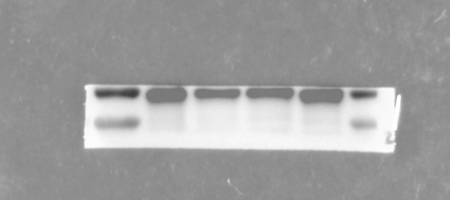

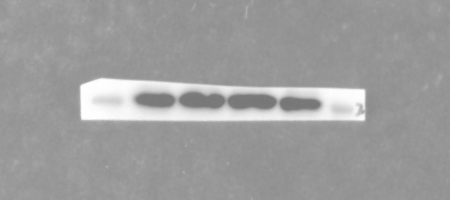

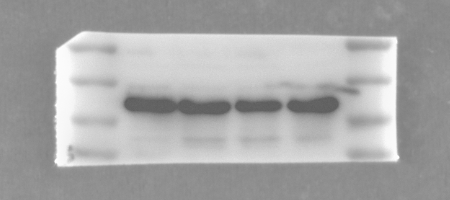

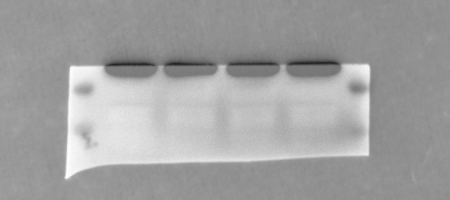

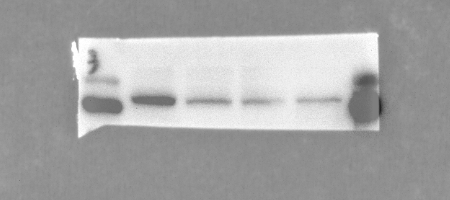

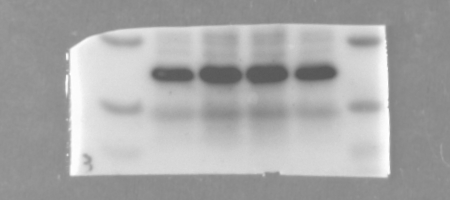

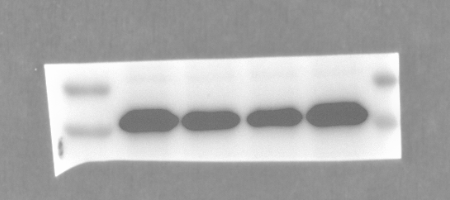

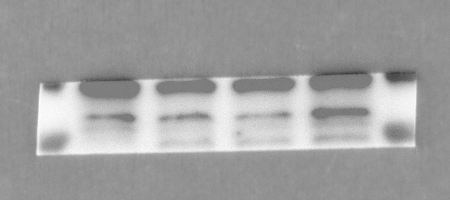

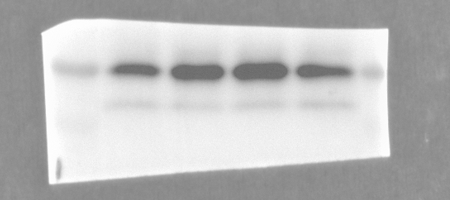

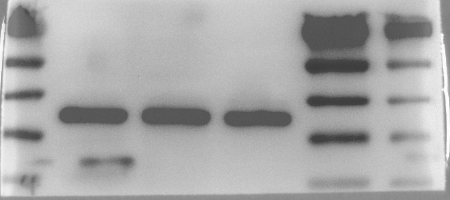

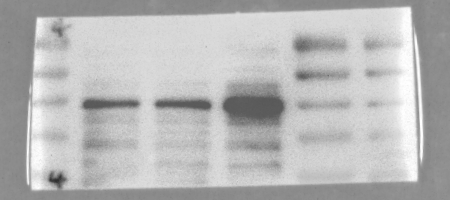

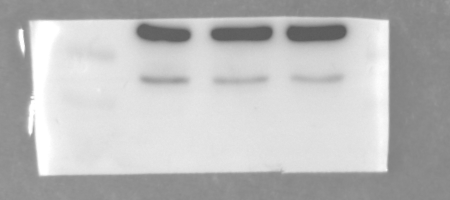

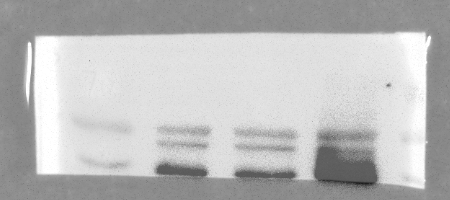


GAPDH

Cleaved Caspase-3

Bax

TBC1D15

Bcl-2

Caspase-3

Cx43

GAPDH

Cx43

GAPDH

Full and uncropped western blot for Figure 4


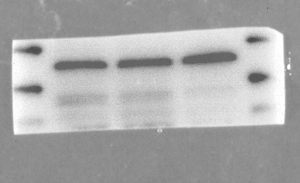

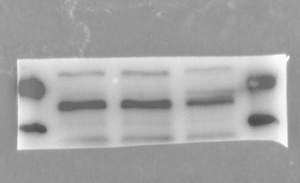

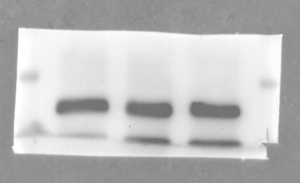

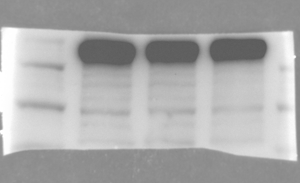

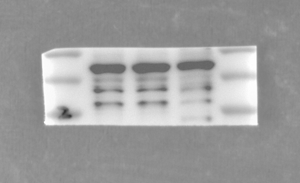

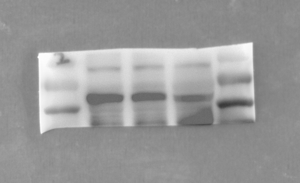

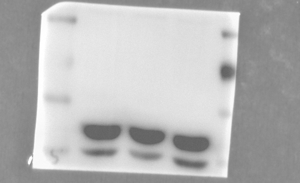

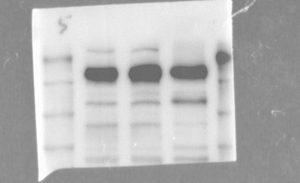

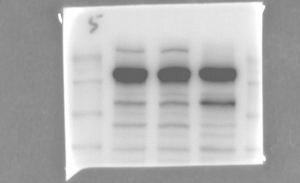

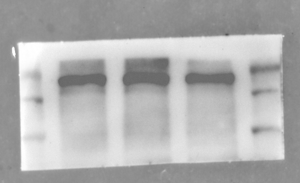

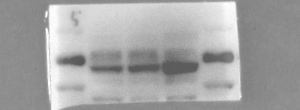

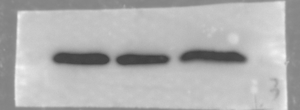

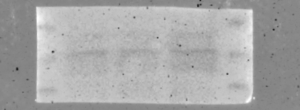

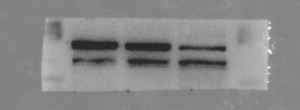

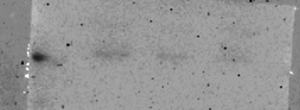

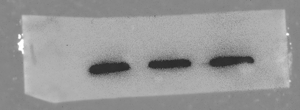

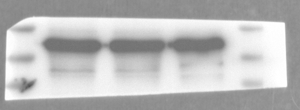

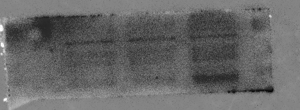

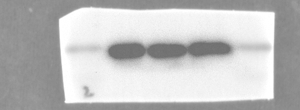

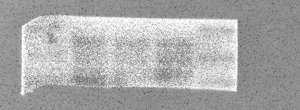

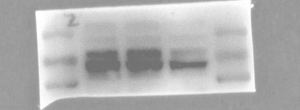

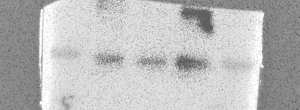

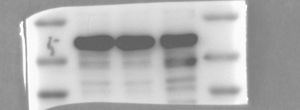

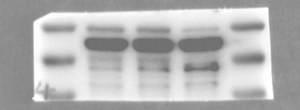

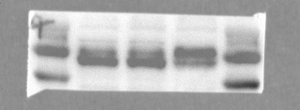

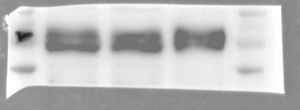


β-Tubulin

mTOR

GAPDH

CaN

P-mTOR

Fig 4G

Fig 4G

Fig 4E

TFEB

H3

GAPDH

H3

GAPDH

TFEB

GAPDH

Fig 4E

TFEB


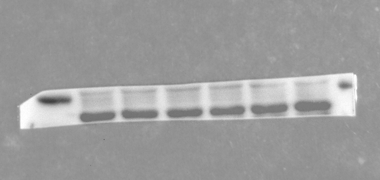
Full and uncropped western blot for Figure 5


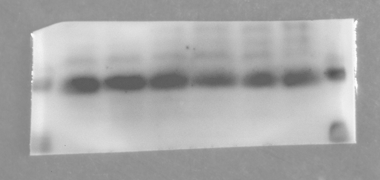

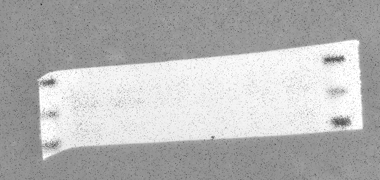

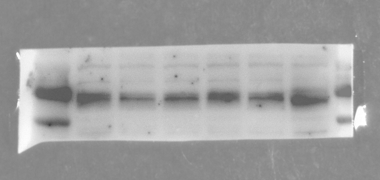


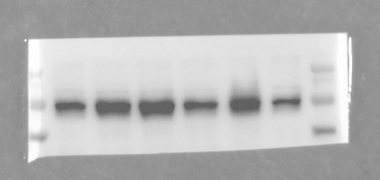


GAPDH

Fig 5E

Fig 5E

TFEB


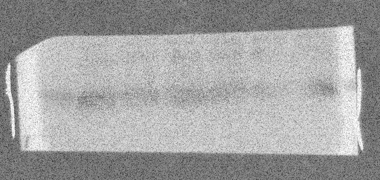


H3

Full and uncropped western blot for Figure 5


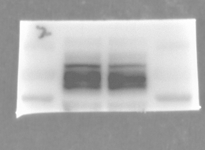

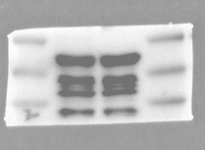

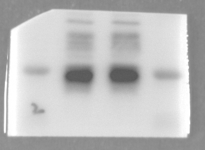

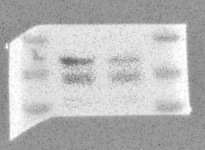

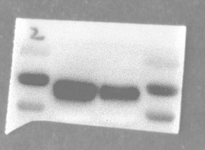

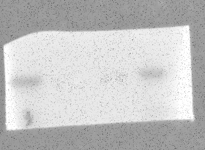

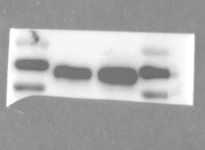

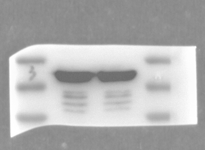

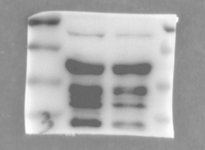

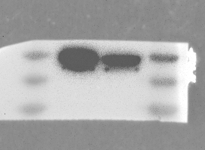

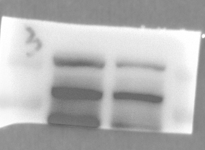

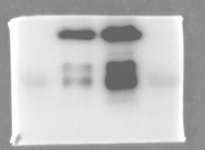

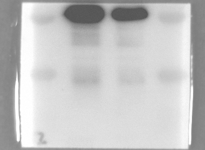

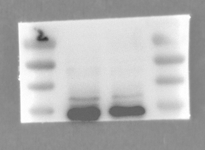

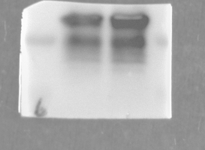

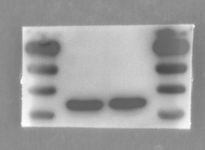

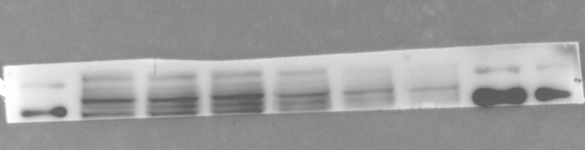

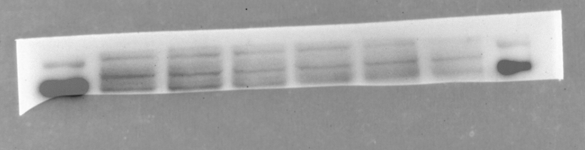


Fig 6H

Fig 6H

Bcl-2

Cleaved Caspase-3

Caspase-3

GAPDH

Cx43

GAPDH

TBC1D15

Dutasteride

Fig 6G

Fig 6F

GAPDH

H3

TFEB

Bax

TBC1D15

TBC1D15

Fig 6H

DMSO

Fig 6B

Full and uncropped western blot for Supplementary Figure 1

Supplementary Fig 1A

Supplementary Fig 1A


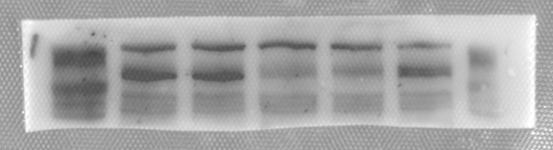

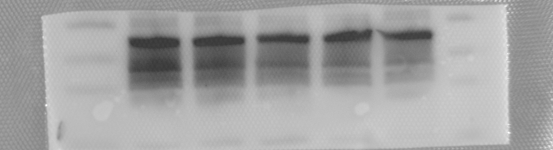

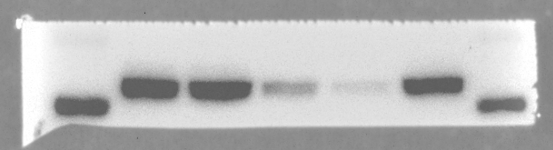

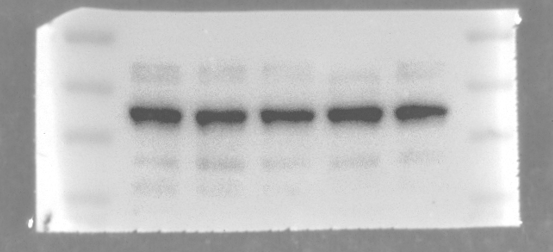


GAPDH

TBC1D15

TBC1D15

GAPDH
