# Supplementary material for: Targeting TBC1D15 Reverses TMZ-resistance in Glioblastoma by Modulating Lysosomal Ca²⁺/TFEB/Cx43 Axis via Mitochondria-Lysosome Contact
Source: Research Square preprint supplement (doi:10.21203/rs.3.rs-7218795/v1), 2025-09-03
Supplement: Supplementary file 2 [file 936148a0bc78f8eac1b2ab39.docx]

| CAS.No | Drug Name | **Binding energy(kcal/mol)** |
| --- | --- | --- |
| 1256388-51-8 | | Ledipasvir | | --- | | -11.1 |
| 1257044-40-8 | Venetoclax | -11.1 |
| 164656-23-9 | Dutasteride | -11 |
| 3562-63-8 | Megestrol | -10.9 |
