# Supplementary material for: Targeting TBC1D15 Reverses TMZ-resistance in Glioblastoma by Modulating Lysosomal Ca²⁺/TFEB/Cx43 Axis via Mitochondria-Lysosome Contact
Source: Research Square preprint supplement (doi:10.21203/rs.3.rs-7218795/v1), 2025-09-03
Supplement: Supplementary file 3 [file bb5f4f6019d85fa1eacae9cb.docx]

**Supplementary Figure 1. Inhibition of TBC1D15 suppresses TMZ resistance and malignant progression of GBM in vitro and in vivo**

**A,** Western blot was performed to validate the knockdown of TBC1D15. (***P*<0.01, ****P*<0.001)

**Supplementary Figure 2. TBC1D15 inhibition reduces Cx43 expression via transcriptional regulation**

**A,** Bioinformatics analysis of the CGGA database revealed significantly higher TBC1D15 mRNA expression in recurrent GBM (rGBM) compared to primary GBM. Survival analysis showed that high TBC1D15 expression is associated with a poor prognosis in GBM patients.
